# Supplementary material for: A new route for fabricating polymer optical microcavities
Source: Royal Society of Chemistry journal article supplement (doi:10.1039/c8nr10007a), 2019-01-01
Supplement: c8nr10007a1.pdf [file c8nr10007a1.pdf]

Supplementary Information for

**A New Route for Fabricating Polymer Optical Microcavities**

Zhang Zhang, † Ni Yao, † Jing Pan, Lei Zhang,\* Wei Fang\* and Limin Tong

State Key Laboratory of Modern Optical Instrumentation, College of Optical Science and  
Engineering, Zhejiang University, Hangzhou, 310027

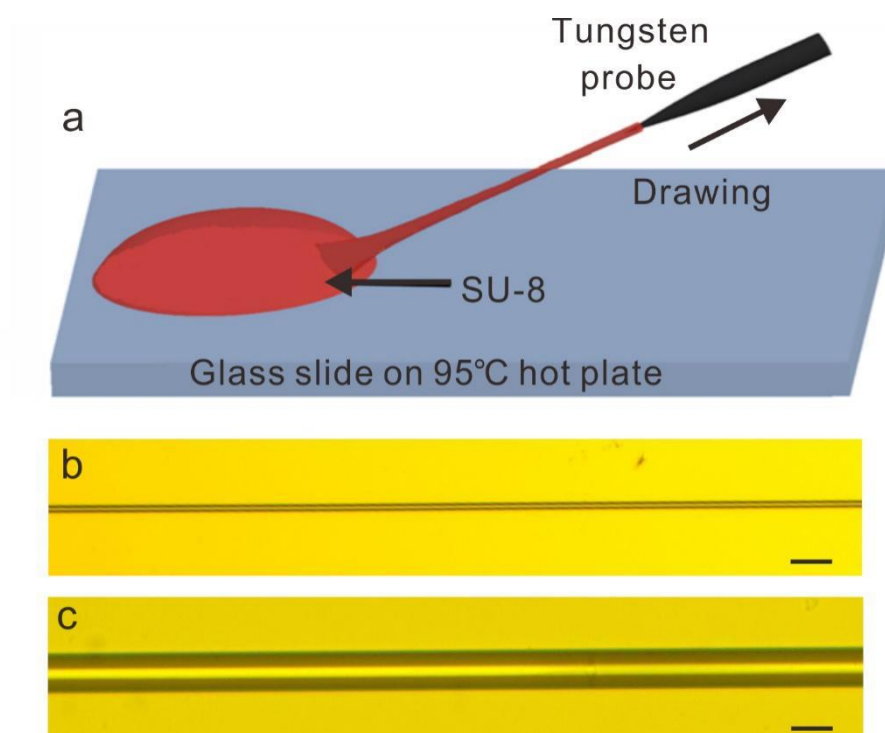

**Fig. S1** Fabrication of SU-8 microwires. (a) Schematic illustration of fabricating SU-8 microwires drawing from heated SU-8 photoresist. (b, c) Optical images of as-fabricated SU-8 microwires with diameter of 12  $\mu\text{m}$  (b) and 100  $\mu\text{m}$  (c), respectively. Scale bars: 100  $\mu\text{m}$ .

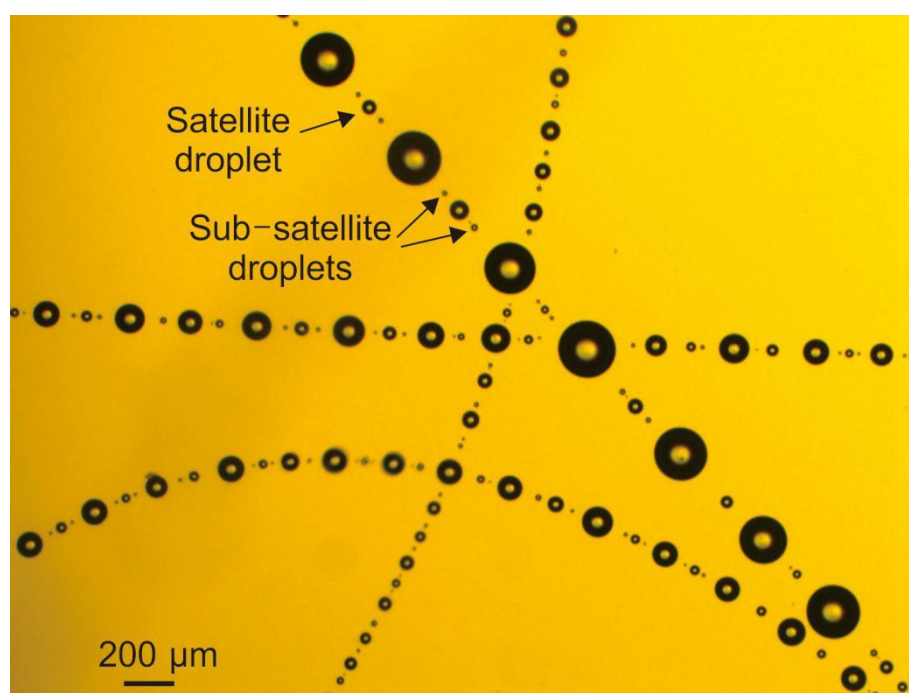

**Fig. S2** Optical image of SU-8 droplets. Different sizes can be obtained by heating SU-8 microwires with different diameters. Satellite and sub-satellite droplets are labelled in the image.

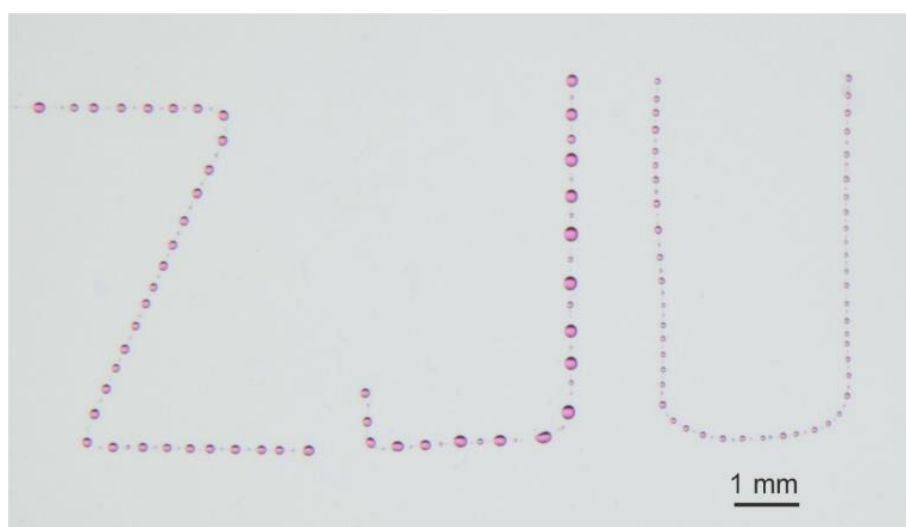

**Fig. S3** Optical image of R6G doped SU-8 droplets with a pattern of “ZJU”.

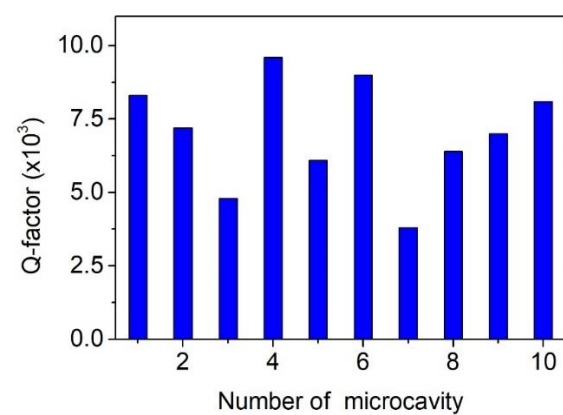

**Fig. S4** Q factors of ten packaged microcavities ( $\sim 100 \mu\text{m}$  in diameter).

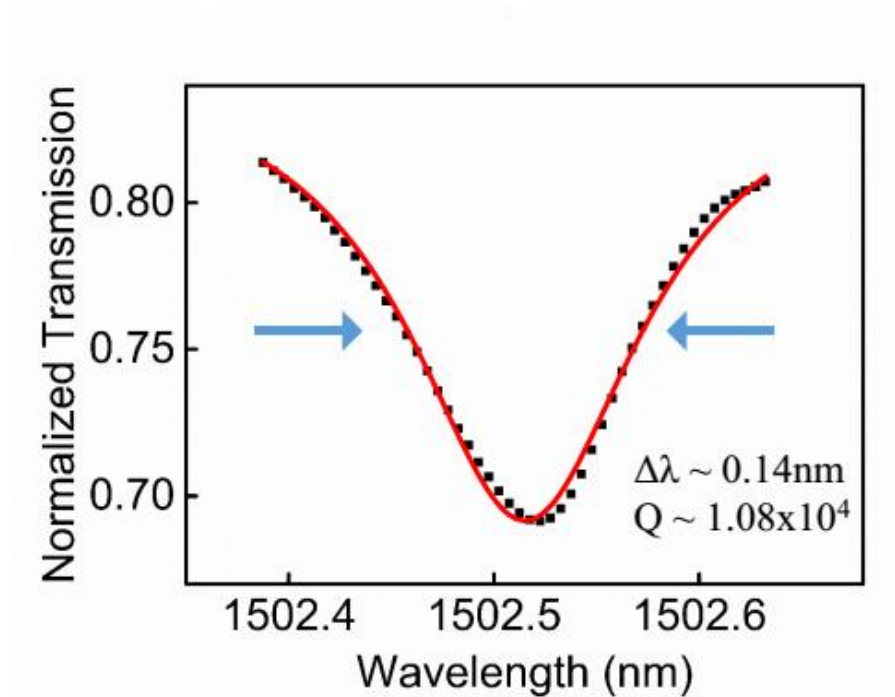

**Fig. S5** The transmission spectrum of a high-quality mode together with a Lorentzian fit.

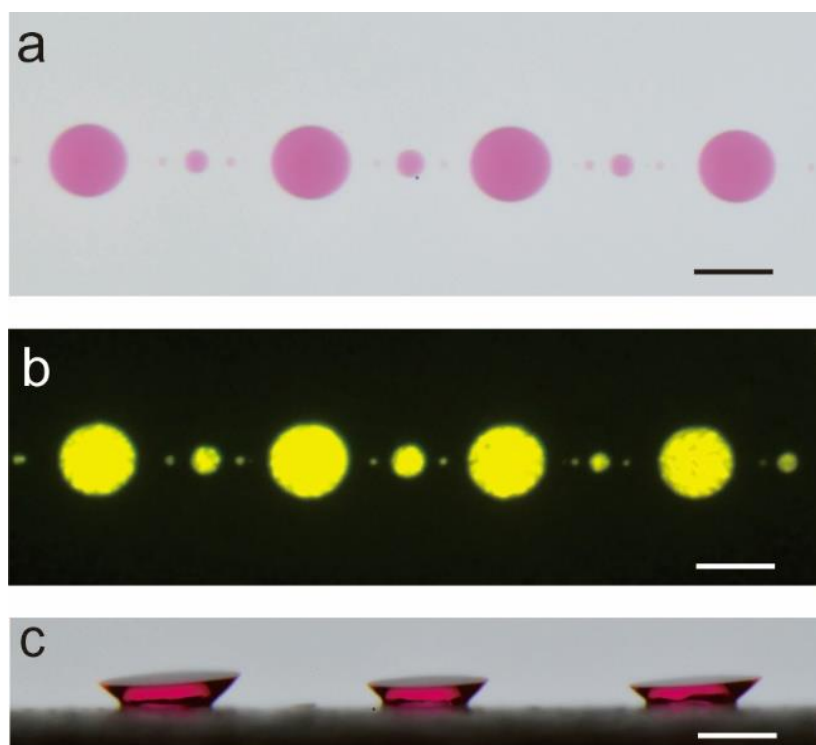

**Fig. S6** (a) Optical image of R6G doped SU-8 droplets. (b) Fluorescent image of R6G doped SU-8 hemispheres. The R6G doped SU-8 hemispheres were illuminated by a 532-nm-wavelength laser from a single mode optical fiber, and the excitation light was eliminated by using a 550-nm-wavelength long pass filter. (c) Image of three SU-8 hemispheres doped with R6G which were peeled off from the PDMS substrate via micromanipulation. Scale bars: 100  $\mu\text{m}$ .

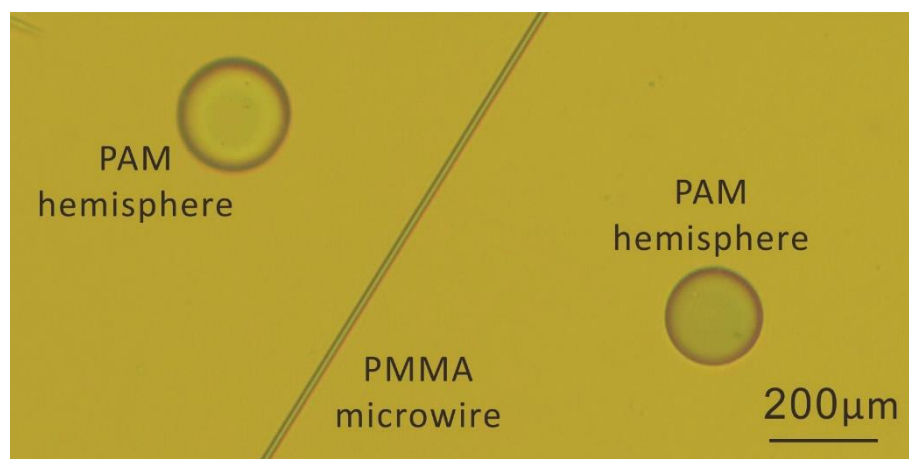

**Fig. S7** Optical image of PMMA microwire and PAM hemispheres obtained by using the self-assembling method.
